CORRECTION

# Correction: Linear Quantitative Profiling Method Fast Monitors Alkaloids of Sophora Flavescens that was Verified by Tri-marker Analyses

Zhifei Hou, Guoxiang Sun, Yong Guo

In “The Linear Quantitative Profiling Method” section, there is an error in the first equation. Please see the complete, correct equation here:

$$r = \frac{\sum_{i=1}^n (x_i - \bar{x})(y_i - \bar{y})}{\sqrt{\sum_{i=1}^n (x_i - \bar{x})^2} \sqrt{\sum_{i=1}^n (y_i - \bar{y})^2}}$$

In “The Linear Quantitative Profiling Method” section, there is an error in the second equation. Please see the complete, correct equation here:

$$b = \frac{n \sum_{i=1}^n x_i y_i - \sum_{i=1}^n x_i \sum_{i=1}^n y_i}{n \sum_{i=1}^n y_i^2 - (\sum_{i=1}^n y_i)^2} \times \frac{m_R}{m_j} \times 100\% \approx \frac{\bar{x}}{\bar{y}} \times \frac{m_R}{m_j} \times 100\% = R \times \frac{m_R}{m_j} \times 100\%$$

## Reference

1. Hou Z, Sun G, Guo Y (2016) Linear Quantitative Profiling Method Fast Monitors Alkaloids of Sophora Flavescens That Was Verified by Tri-Marker Analyses. PLoS ONE 11(8): e0161146. doi:[10.1371/journal.pone.0161146](https://doi.org/10.1371/journal.pone.0161146) PMID: [27529425](https://pubmed.ncbi.nlm.nih.gov/27529425/)

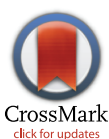

## OPEN ACCESS

**Citation:** Hou Z, Sun G, Guo Y (2016) Correction: Linear Quantitative Profiling Method Fast Monitors Alkaloids of Sophora Flavescens that was Verified by Tri-marker Analyses. PLoS ONE 11(12): e0168308. doi:[10.1371/journal.pone.0168308](https://doi.org/10.1371/journal.pone.0168308)

**Published:** December 12, 2016

**Copyright:** © 2016 Hou et al. This is an open access article distributed under the terms of the [Creative Commons Attribution License](https://creativecommons.org/licenses/by/4.0/), which permits unrestricted use, distribution, and reproduction in any medium, provided the original author and source are credited.
